# Supplementary material
Source: PubMed Central journal article supplement (PMC6349491)
Supplement: NIHMS1516597-supplement-COA_signed_Cornwell.pdf [file NIHMS1516597-supplement-COA_signed_Cornwell.pdf]

## Change of Authorship Form

(Must be completed and signed by ALL authors)

Please check all that apply

New author(s) have been added (in addition to this form, all new authors must complete the copyright transfer agreement and conflict of interest disclosure.

Change in order of authorship.

An author wishes to remove his/her name. An author's name may only be removed his/her own request and a letter signed by the author should accompany this form

Manuscript Number 022967R1

Manuscript Title Frequency of Stroke and Impact of Continuous-Flow Left Ventricular Assist Devices on Cerebrovascular Physiology

### Former Authorship

Please list ALL AUTHORS in the same order as the original submission. For more than 12, use an extra sheet.

#### Print Name

Name (1) William K. Cornwel III MD  
Name (2) Amrut V. Ambardekar MD  
Name (3) Jay D. Pal MD, PhD  
Name (4) Luis Cava MD  
Name (5) Justin Lawley PhD  
Name (6) Takashi Tarumi PhD

#### Print Name

Name (7) Christy L. Cornwell BS, RVT  
Name (8) Keith Aaronson MD, MS  
Name (9) \_\_\_\_\_  
Name (10) \_\_\_\_\_  
Name (11) \_\_\_\_\_  
Name (12) \_\_\_\_\_

### New Authorship

All authors must sign below agreeing to the changes in authorship. The authorship order must reflect the authorship order of the manuscript.

|                                             |                                                                                                |                     |
|---------------------------------------------|------------------------------------------------------------------------------------------------|---------------------|
| Name (1) <u>William K. Cornwell III, MD</u> | Signature 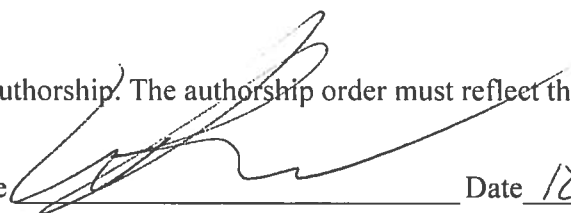 | Date <u>12/4/18</u> |
| Name (2) <u>Amrut V. Ambardekar MD</u>      | Signature _____                                                                                | Date _____          |
| Name (3) <u>Tomio Tran MD</u>               | Signature _____                                                                                | Date _____          |
| Name (4) <u>Jay D. Pal MD, PhD</u>          | Signature _____                                                                                | Date _____          |
| Name (5) <u>Luis Cava MD</u>                | Signature _____                                                                                | Date _____          |
| Name (6) <u>Justin Lawley PhD</u>           | Signature _____                                                                                | Date _____          |
| Name (7) <u>Takashi Tarumi PhD</u>          | Signature _____                                                                                | Date _____          |
| Name (8) <u>Christy L. Cornwell BS, RVT</u> | Signature _____                                                                                | Date _____          |
| Name (9) <u>Keith Aaronson MD, MS</u>       | Signature _____                                                                                | Date _____          |
| Name (10) _____                             | Signature _____                                                                                | Date _____          |
| Name (11) _____                             | Signature _____                                                                                | Date _____          |
| Name (12) _____                             | Signature _____                                                                                | Date _____          |

Please scan and email to [stroke@strokeahajournal.org](mailto:stroke@strokeahajournal.org).
