# Supplementary material
Source: PubMed Central journal article supplement (PMC6349491)
Supplement: NIHMS1516597-supplement-COA_signed_Taka.pdf [file NIHMS1516597-supplement-COA_signed_Taka.pdf]

## Change of Authorship Form

(Must be completed and signed by ALL authors)

Please check all that apply

New author(s) have been added (in addition to this form, all new authors must complete the copyright transfer agreement and conflict of interest disclosure.

Change in order of authorship.

An author wishes to remove his/her name. An author's name may only be removed his/her own request and a letter signed by the author should accompany this form

Manuscript Number 022967R1

Manuscript Title Frequency of Stroke and Impact of Continuous-Flow Left Ventricular Assist Devices on Cerebrovascular Physiology

### Former Authorship

Please list ALL AUTHORS in the same order as the original submission. For more than 12, use an extra sheet.

#### Print Name

Name (1) William K. Cornwel III MD

Name (2) Amrut V. Ambardekar MD

Name (3) Jay D. Pal MD, PhD

Name (4) Luis Cava MD

Name (5) Justin Lawley PhD

Name (6) Takashi Tarumi PhD

#### Print Name

Name (7) Christy L. Cornwell BS, RVT

Name (8) Keith Aaronson MD, MS

Name (9) \_\_\_\_\_

Name (10) \_\_\_\_\_

Name (11) \_\_\_\_\_

Name (12) \_\_\_\_\_

### New Authorship

All authors must sign below agreeing to the changes in authorship. The authorship order must reflect the authorship order of the manuscript.

Name (1) William K. Cornwell III, MD

Signature \_\_\_\_\_

Date \_\_\_\_\_

Name (2) Amrut V. Ambardekar MD

Signature \_\_\_\_\_

Date \_\_\_\_\_

Name (3) Tomio Tran MD

Signature \_\_\_\_\_

Date \_\_\_\_\_

Name (4) Jay D. Pal MD, PhD

Signature \_\_\_\_\_

Date \_\_\_\_\_

Name (5) Luis Cava MD

Signature \_\_\_\_\_

Date \_\_\_\_\_

Name (6) Justin Lawley PhD

Signature \_\_\_\_\_

Date \_\_\_\_\_

Name (7) Takashi Tarumi PhD

Signature Takashi Tarumi

Date 11/27/18

Name (8) Christy L. Cornwell BS, RVT

Signature \_\_\_\_\_

Date \_\_\_\_\_

Name (9) Keith Aaronson MD, MS

Signature \_\_\_\_\_

Date \_\_\_\_\_

Name (10) \_\_\_\_\_

Signature \_\_\_\_\_

Date \_\_\_\_\_

Name (11) \_\_\_\_\_

Signature \_\_\_\_\_

Date \_\_\_\_\_

Name (12) \_\_\_\_\_

Signature \_\_\_\_\_

Date \_\_\_\_\_

Please scan and email to [stroke@strokeahajournal.org](mailto:stroke@strokeahajournal.org).
